# Supplementary material
Source: Springer Nature journal article supplement (https://www.springermedizin.de/resource/supplementary/12911_2006_137_MOESM3_ESM.pdf/9527296)

Major columns show the five distributions, plus a column for single-day outbreaks.

### Distribution

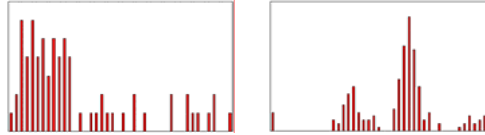

Minor rows indicate the total number of cases added to the baseline from the simulated outbreak signal.

Simulated outbreak signal: additional counts above baseline

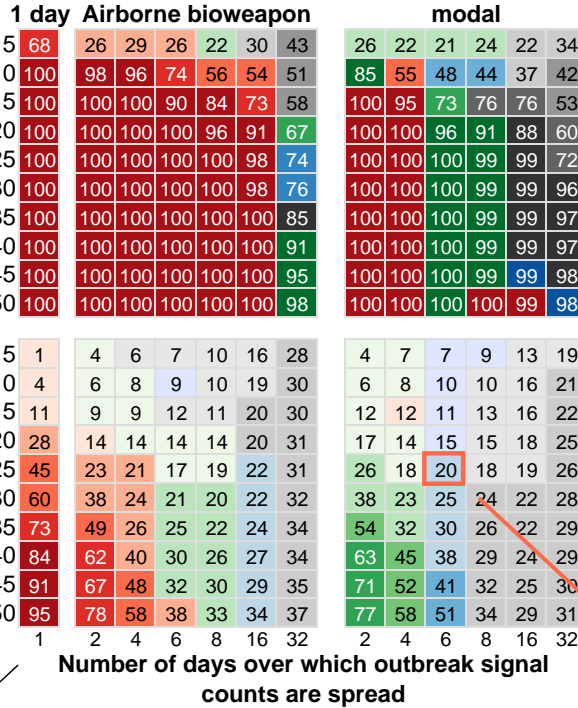

Major rows indicate the baselines, by average daily counts.

Average daily counts of baseline

This cell shows an outbreak signal of 25 cases over six days chosen from the multi-modal distribution, added to the baseline with mean 60 counts per day. The GLM detected 20% of such signals. Among detected signals, the median day of first alert was the third day of the signal.

Minor columns show the duration of the simulated outbreak signal.

Number of days over which outbreak signal counts are spread

### Legend

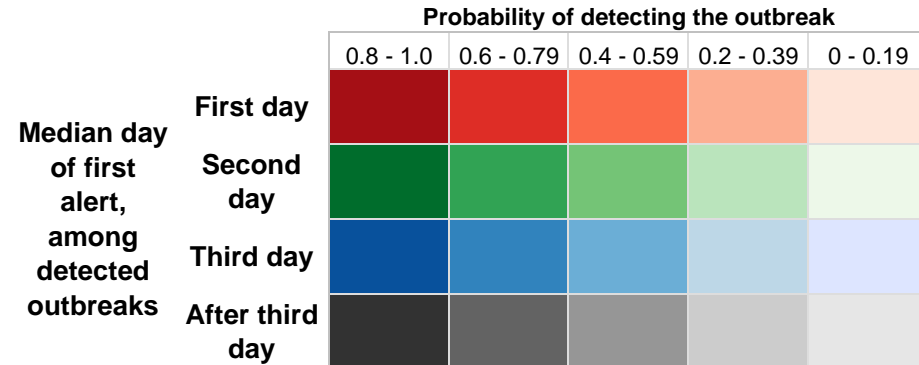

Supplement: MOESM3 [file 9527296]
